# Supplementary material
Source: HighWire-hosted journal article supplement (https://rmdopen.bmj.com/content/4/1/e000578)
Supplement: inline-supplementary-material-1 [file inline-supplementary-material-1.docx]

Supplementary Table 1. Univariate statistics for each case scenario

|  | | | | | | | |
| --- | --- | --- | --- | --- | --- | --- | --- |
| No. of Scenarios | N | Mean | Standard Deviation | Missing | | No. of Extremes | |
| Count | Percent | Low | High |
| 1 | 108 | 3.44 | 1.731 | 1 | .9 | 0 | 6 |
| 2 | 108 | 4.55 | 1.648 | 1 | .9 | 0 | 0 |
| 3 | 109 | 5.19 | 1.858 | 0 | .0 | 2 | 5 |
| 4 | 103 | .76 | .857 | 6 | 5.5 | 0 | 4 |
| 5 | 103 | 7.79 | 1.218 | 6 | 5.5 | 1 | 0 |
| 6 | 102 | 7.17 | 1.605 | 7 | 6.4 | 2 | 0 |
| 7 | 99 | 3.60 | 1.868 | 10 | 9.2 | 0 | 0 |
| 8 | 99 | 2.79 | 1.786 | 10 | 9.2 | 0 | 0 |
| 9 | 93 | 6.11 | 1.339 | 16 | 14.7 | 0 | 0 |
| 10 | 93 | 8.72 | 1.117 | 16 | 14.7 | 1 | 0 |
| 11 | 93 | 2.03 | 1.577 | 16 | 14.7 | 0 | 4 |
| 12 | 93 | 3.72 | 1.556 | 16 | 14.7 | 3 | 10 |
| 13 | 81 | 1.77 | 1.425 | 28 | 25.7 | 0 | 10 |
| 14 | 81 | 5.37 | 1.764 | 28 | 25.7 | 1 | 3 |
| 15 | 83 | 6.04 | 1.518 | 26 | 23.9 | 0 | 0 |
| 16 | 80 | 1.59 | 1.087 | 29 | 26.6 | 0 | 3 |
| 17 | 80 | 4.46 | 1.440 | 29 | 26.6 | 5 | 7 |
| 18 | 80 | 2.05 | 1.771 | 29 | 26.6 | 0 | 5 |
| 19 | 79 | 2.76 | 1.681 | 30 | 27.5 | 0 | 3 |
| 20 | 78 | 2.08 | 1.297 | 31 | 28.4 | 0 | 1 |
| 21 | 78 | 3.46 | 1.421 | 31 | 28.4 | 0 | 2 |
| 22 | 78 | 3.82 | 1.569 | 31 | 28.4 | 0 | 2 |
| 23 | 77 | 4.56 | 2.049 | 32 | 29.4 | 0 | 0 |
| 24 | 77 | .99 | 1.352 | 32 | 29.4 | 0 | 8 |
| 25 | 77 | 2.94 | 1.380 | 32 | 29.4 | 0 | 1 |
| 26 | 77 | 4.58 | 1.436 | 32 | 29.4 | 0 | 1 |
| 27 | 77 | 7.97 | 1.337 | 32 | 29.4 | 2 | 0 |
| 28 | 77 | 4.13 | 1.454 | 32 | 29.4 | 0 | 2 |
| 29 | 76 | 4.04 | 1.280 | 33 | 30.3 | 0 | 0 |
| 30 | 76 | 4.64 | 1.334 | 33 | 30.3 | 1 | 7 |
| 31 | 75 | 3.73 | 1.398 | 34 | 31.2 | 2 | 8 |
| 32 | 75 | 4.99 | 1.225 | 34 | 31.2 | 0 | 1 |
| 33 | 76 | 3.95 | 1.413 | 33 | 30.3 | 0 | 2 |
| 34 | 74 | 3.09 | 2.042 | 35 | 32.1 | 0 | 1 |
| 35 | 74 | 3.57 | 2.159 | 35 | 32.1 | 0 | 1 |
| 36 | 73 | 4.53 | 2.049 | 36 | 33.0 | 0 | 0 |
| 37 | 72 | 8.72 | 1.292 | 37 | 33.9 | 2 | 0 |
| 38 | 72 | 5.03 | 1.289 | 37 | 33.9 | 1 | 0 |
| 39 | 72 | 2.47 | 1.510 | 37 | 33.9 | 0 | 3 |
| 40 | 70 | 5.43 | 1.566 | 39 | 35.8 | 0 | 0 |
| 41 | 72 | 1.81 | 1.206 | 37 | 33.9 | 0 | 4 |
| 42 | 72 | 1.32 | 1.382 | 37 | 33.9 | 0 | 2 |
